# Supplementary material for: Injury-induced ASCL1 expression orchestrates a transitory cell state required for repair of the neonatal cerebellum
Source: PubMed Central journal article supplement (PMC8654303; doi:10.1126/sciadv.abj1598), 2021-12-08
Supplement: sciadv.abj1598_sm.pdf [file sciadv.abj1598_sm.pdf]

Supplementary Materials for  
**Injury-induced ASCL1 expression orchestrates a transitory cell state  
required for repair of the neonatal cerebellum**

N. Sumru Bayin\*, Dogukan Mizrak, Daniel N. Stephen, Zhimin Lao,  
Peter A. Sims, Alexandra L. Joyner\*

\*Corresponding author. Email: joynera@mskcc.org (A.L.J.); bayinn@mskcc.org (N.S.B.)

Published 8 December 2021, *Sci. Adv.* 7, eabj1598 (2020)  
DOI: 10.1126/sciadv.abj1598

**The PDF file includes:**

Figs. S1 to S13  
Tables S3 to S5 and S9 to S12  
Legends for movies S1 and S2  
Legends for tables S1, S2 and S6 to S8

**Other Supplementary Material for this manuscript includes the following:**

Movies S1 and S2  
Tables S1, S2 and S6 to S8

## Supplementary Figures and Figure Legends

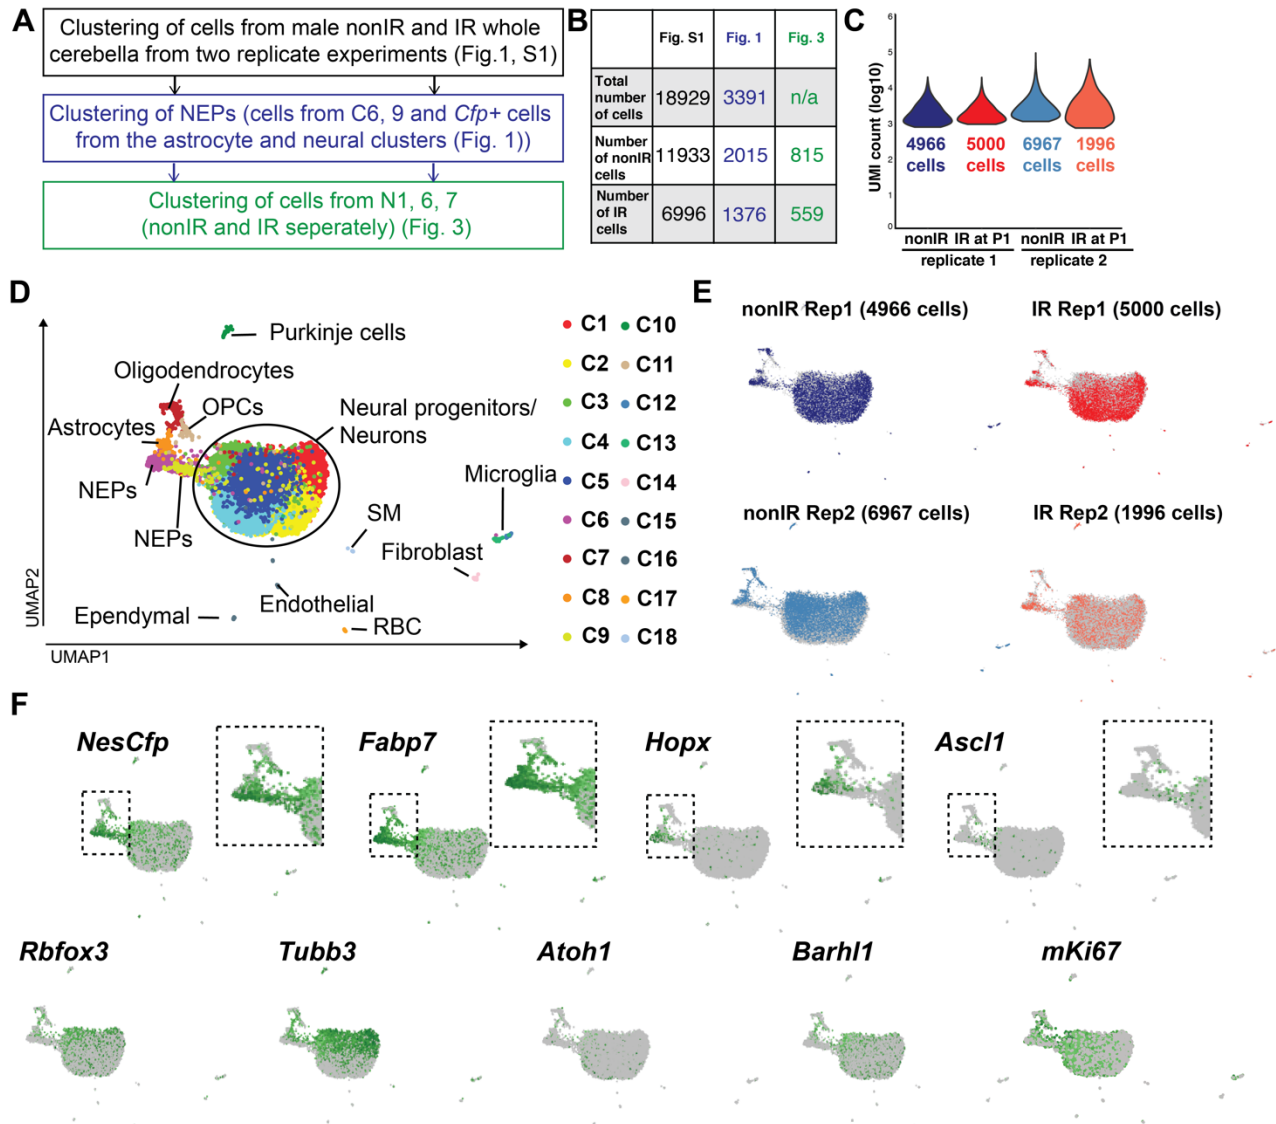

**Fig. S1. Summary of the scRNA-seq experiments and the initial clustering of the 18,929 cells from nonIR and IR cerebella at P5. A.** Schematic explaining the clustering logic used for the scRNA-seq data analysis. **B.** Table summarizing the number of cells from nonIR and IR that were used for each analysis and the figures where the analyses are represented. **C.** Distribution of the UMI counts (log<sub>10</sub>) of the samples sequenced that passed quality control. **D-E.** UMAP visualization of the clustering of 18,929 cells shown by cell types (clusters, D) and by condition across two replicates (E) 18 clusters were

detected using Phenograph. *Nes-Cfp* was enriched in clusters 3, 6-11 (Table S1), insets shown the *Cfp* enriched clusters. **F.** Expression levels of *Nes-Cfp* and other gliogenic and neurogenic lineage makers and mKi67 projected on UMAP (scale shows the log transformed CPM (counts per million) where the darker colors show higher expression). SM: smooth muscle, RBC: red blood cell, OPC: oligodendrocyte progenitor cells

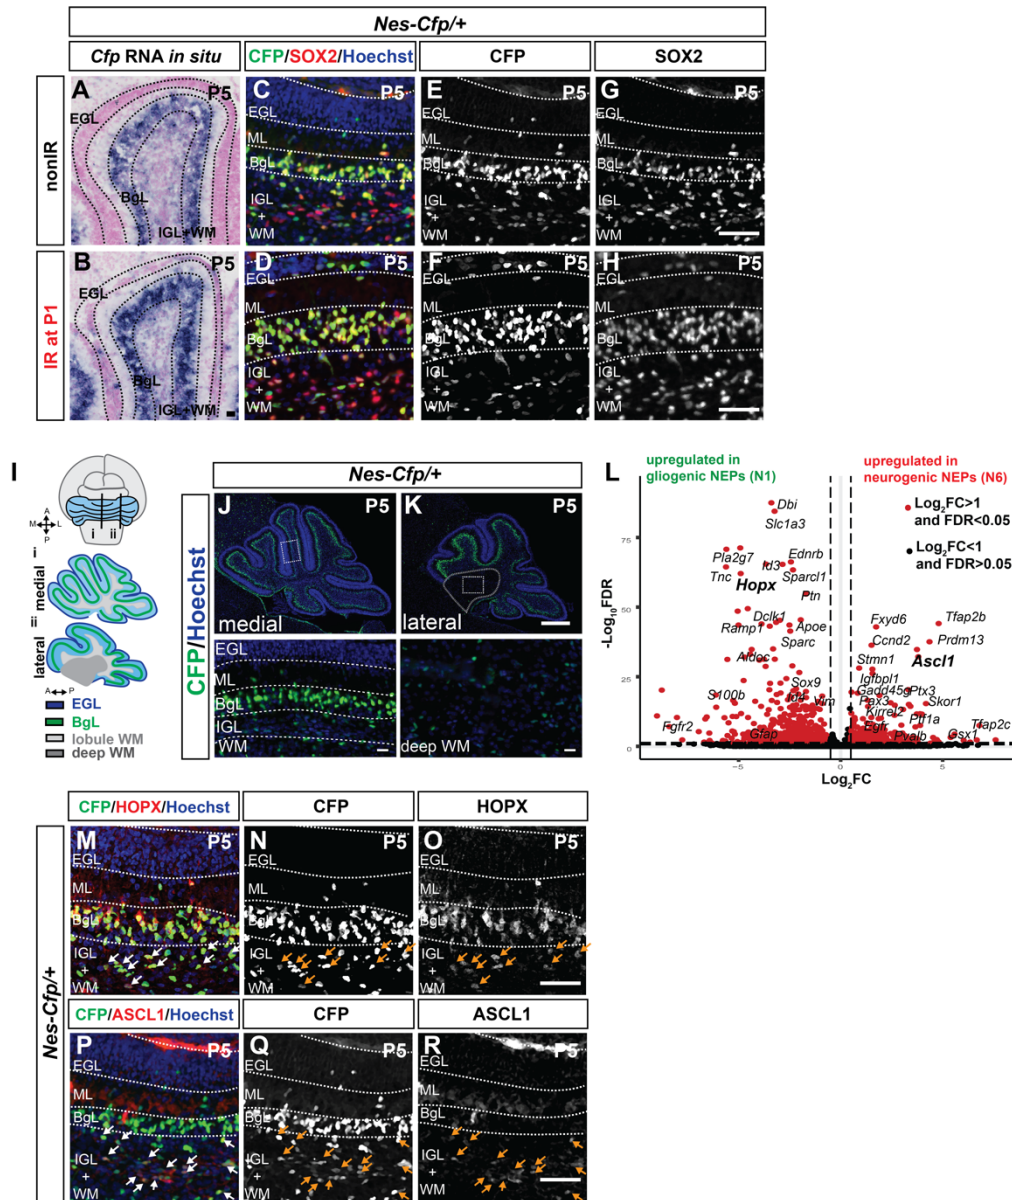

**Fig. S2. Validation of the *Nes-Cfp* reporter at P5 on nonIR and IR cerebellar sections and characterization of the expression patterns of the gliogenic (HOPX) and neurogenic (ASCL1) NEP markers. A-B.** RNA in situ hybridization for *Cfp* on sections from nonIR and IR P5 *Nes-Cfp*<sup>+/+</sup> cerebella. **C-H.** IF analysis of CFP and SOX2 on sections from nonIR (C, E, G) and IR (D, F, H) P5 *Nes-Cfp*<sup>+/+</sup> cerebella shows high overlap for CFP and SOX2 (pan-NEP/astroglial marker). **I.** Schematics showing the sagittal levels



of the medial and lateral cerebellum used for analysis. **J-K.** IF analysis of P5 *Nes-Cfp*<sup>+</sup> nonIR cerebella at medial (J) and lateral (K) levels showing the distinct localization of NEPs within the cerebellum. **L.** Volcano plots showing the differentially expressed genes (FC: fold change and FDR: false discovery rate, Table S2) obtained from the comparison of the undifferentiated gliogenic (N1) and the neurogenic (N6) NEPs. **M-R.** IF analysis of HOPX (M-O) and ASCL1 (P-R) on sections from P5 *Nes-Cfp*<sup>+</sup> cerebella show that all HOPX<sup>+</sup> and ASCL1<sup>+</sup> cells are CFP positive (arrows show double positive cells in the IGL and WM). EGL: external granule layer, ML: molecular layer, BgL: Bergmann glia layer, IGL: internal granule layer, WM: white matter. Scale bars: 50 $\mu$ m, J-K: 500 $\mu$ m,

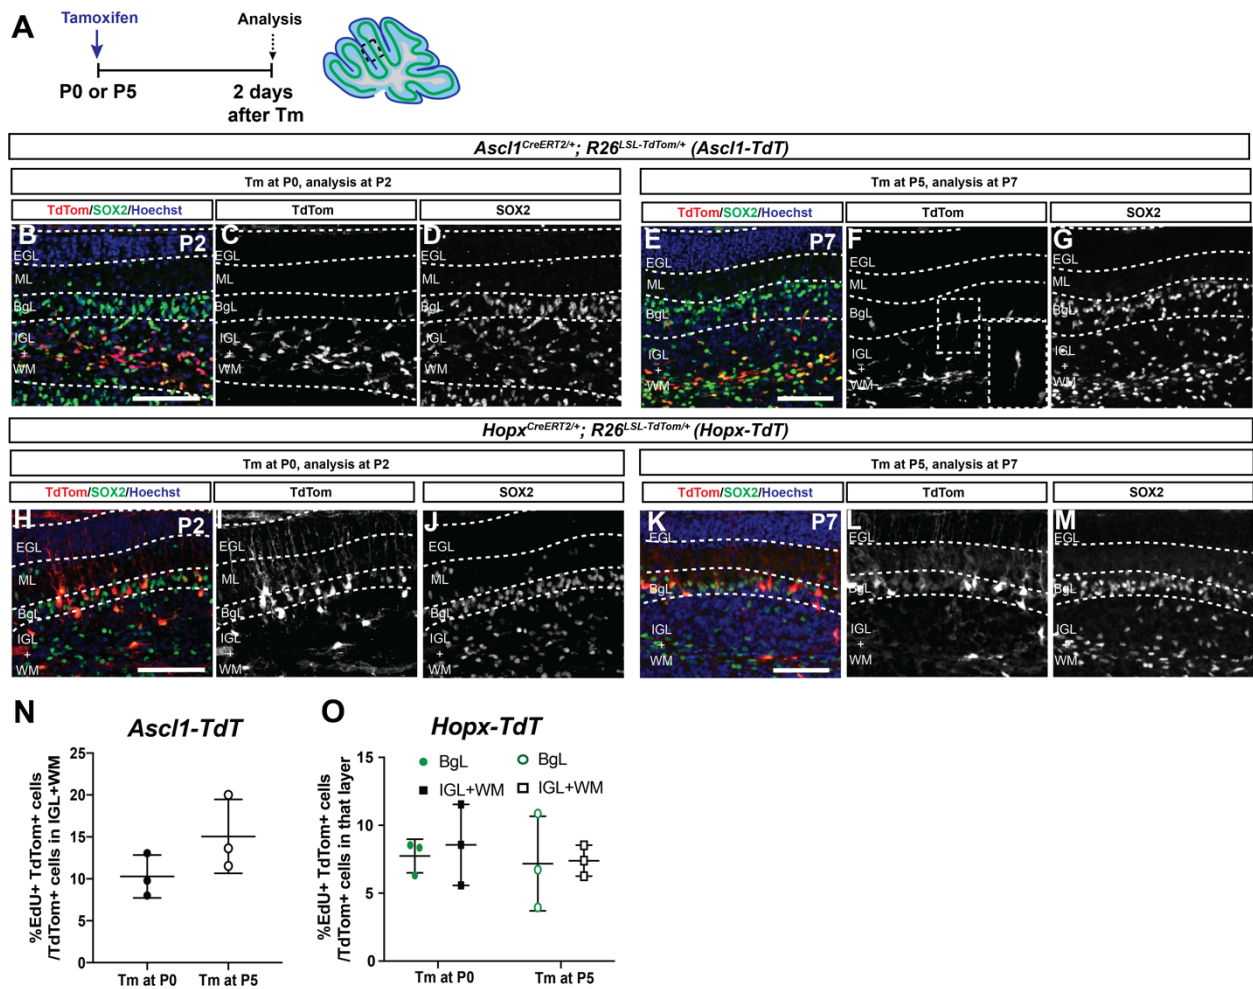

**Fig. S3. Short term genetic inducible fate mapping identifies the localization of neurogenic and astroglial NEP subtypes and NEP subtypes are proliferative.**

**A.** Experimental plan and the region of the cerebellum shown in the images. **B-G.** IF analysis used for the quantification of the TdT<sup>+</sup> cells by layer 2 days after Tm injection (B-D: Tm at P0, E-G: Tm at P5) in *Ascl1-TdT* animals (n=3 brains/age). **H-M.** IF analysis used for the quantification of the TdT<sup>+</sup> cells by layer 2 days after Tm injection (H-J: Tm at P0, K-M: Tm at P5) in *Hopx-TdT* animals (n=3 brains/age). SOX2 is used to identify all NEPs. N-O. Proliferation of the NEPs is analyzed by injecting EdU 1 hour before sacrifice. Quantification of the percentage of EdU<sup>+</sup> TdT<sup>+</sup> cells in all TdT<sup>+</sup> cells in the respective

layers showed that both *Ascl1-TdT+* (N) and *Hopx-TdT+* (O) cells are proliferative at P0 and at P5, confirming their progenitor status (n=3 brains/condition). Scale bars: 100  $\mu$ m, EGL: external granule layer, ML: molecular layer, BgL: Bergmann glia layer, IGL: internal granule layer, WM: white matter

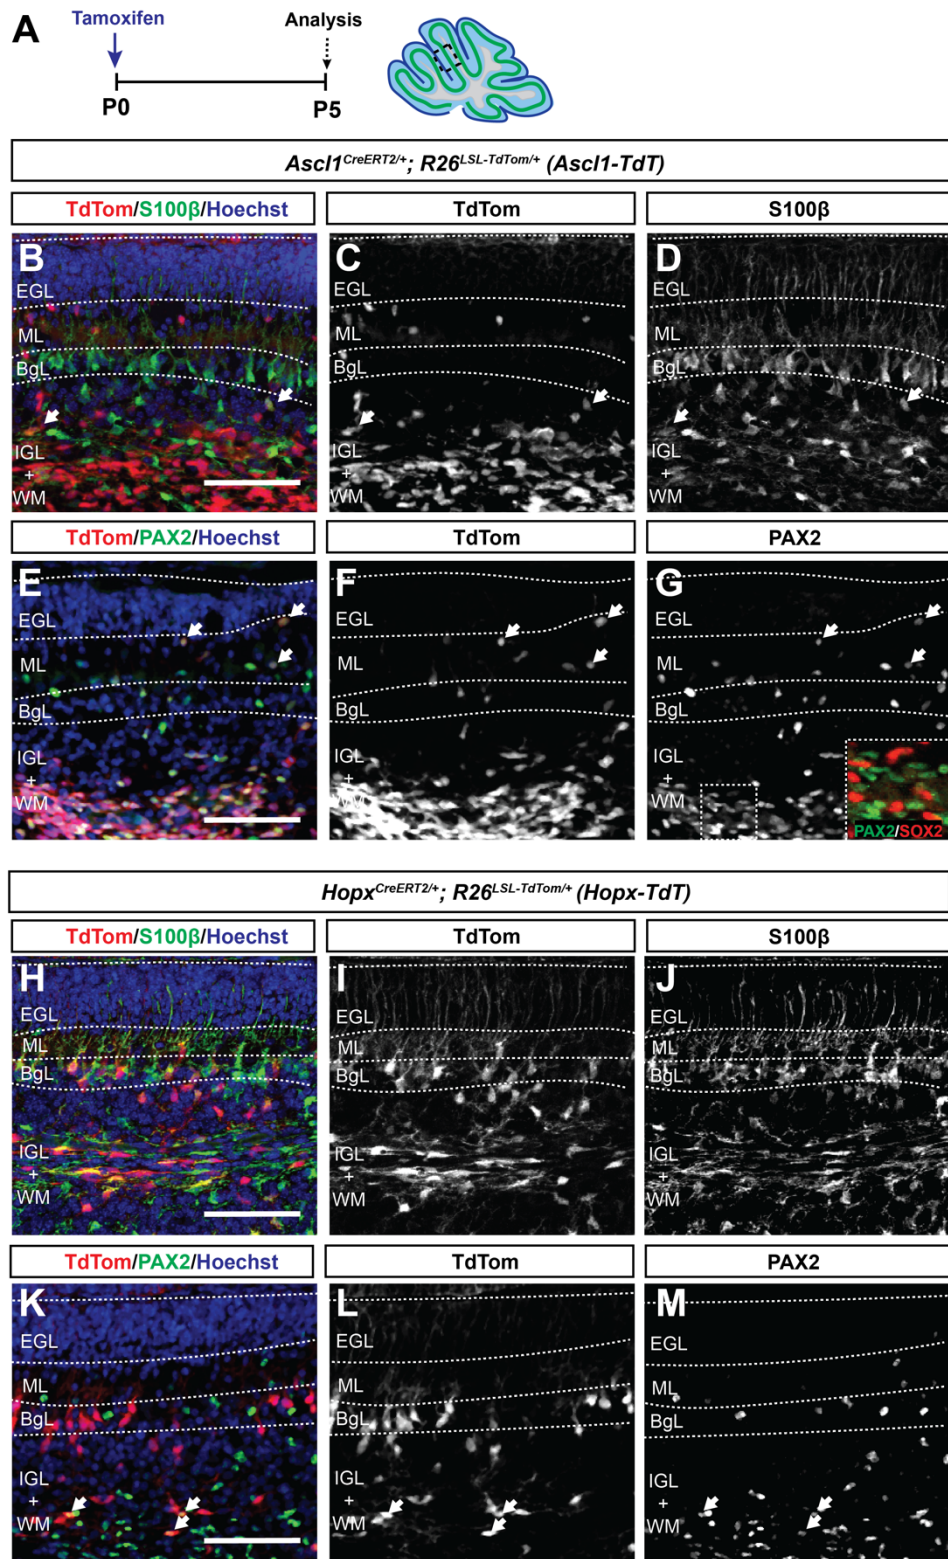

**Fig. S4.** Analysis of the progeny of *Ascl1-TdT*<sup>+</sup> and *Hopx-TdT*<sup>+</sup> cells that were given Tm at P0 and analyzed at P5 for lineage markers shows the lineage propensities of

**the NEP subtypes. A.** Experimental plan and the region of the cerebellum shown in the images. **B-G.** IF analysis of *Ascl1-TdT* cerebellar that were given Tm at P0 and analyzed at P5 shows that majority of the TdT<sup>+</sup> cells are in the WM and IGL and are PAX2<sup>+</sup> (immature interneuron marker, E-G), whereas rare cells showed co-expression with S100 $\beta$  (glial marker, arrows B-D). Some of the TdT<sup>+</sup> cells that are migrating (in the BgL or ML) showed costaining with PAX2 (arrows, (E-G)). **H-M.** IF analysis of *Hopx-TdT* cerebellar that were given Tm at P0 and analyzed at P5 shows that majority of the TdT<sup>+</sup> cells are in the BgL, some are in the WM and IGL and most of the TdT<sup>+</sup> cells are S100 $\beta$ <sup>+</sup> (H-J), whereas rare cells showed co-expression with PAX2 in the WM (arrows K-M). EGL: external granule layer, ML: molecular layer, BgL: Bergmann glia layer, IGL: internal granule layer, WM: white matter. Scale bars: 100 $\mu$ m

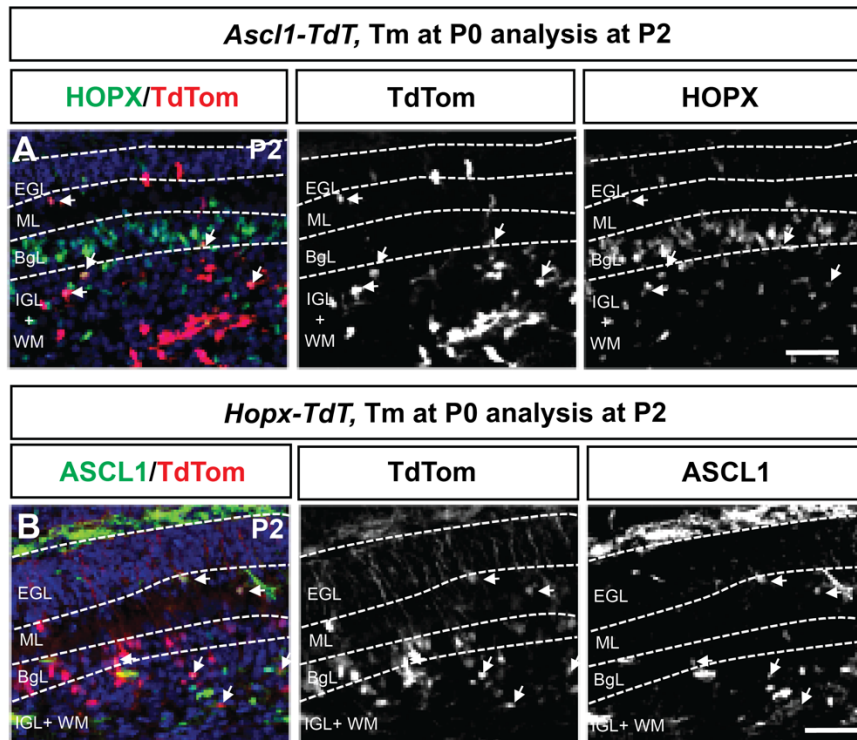

**Fig. S5. Overlap between the *Ascl1*+ neurogenic and *Hopx*+ astroglial NEPs at P0.** **A-B.** Short term genetic inducible fate mapping and IF analysis for HOPX and ASCL1 in the *Ascl1-TdT* (A) and *Hopx-TdT* (B) cerebella, respectively, that were administered Tm at P0 and analyzed at P2 shows ~10% overlap between the HOPX+ and ASCL1+ NEPs, mostly in the IGL + WM and migrating interneurons progenitors in the ML (n=3 brains/genotype). Arrows show marker positive TdT+ cells. Scale bars: 50µm, EGL: external granule layer, ML: molecular layer, BgL: Bergmann glia layer, IGL: internal granule layer, WM: white matter



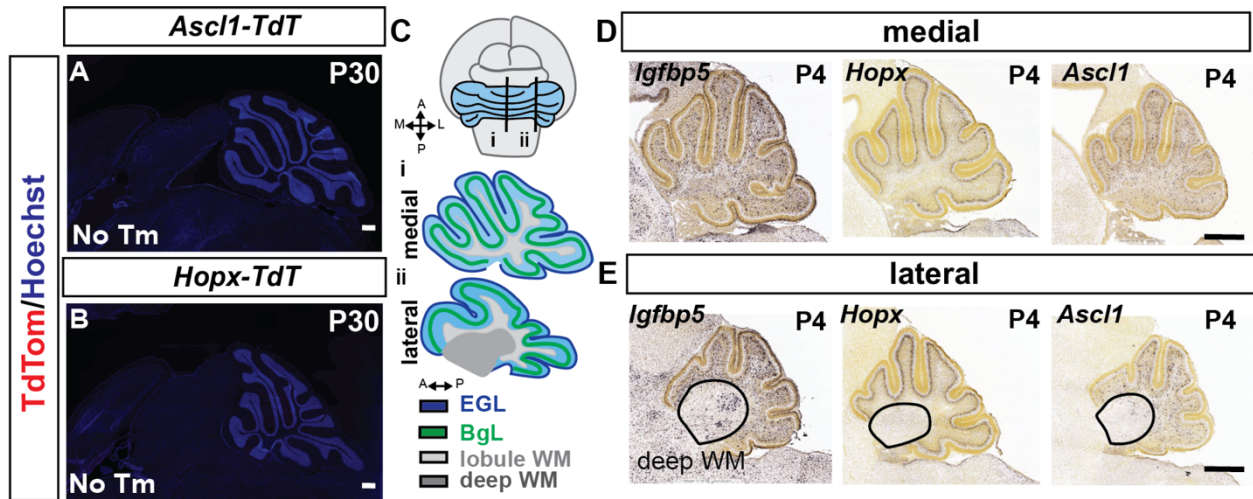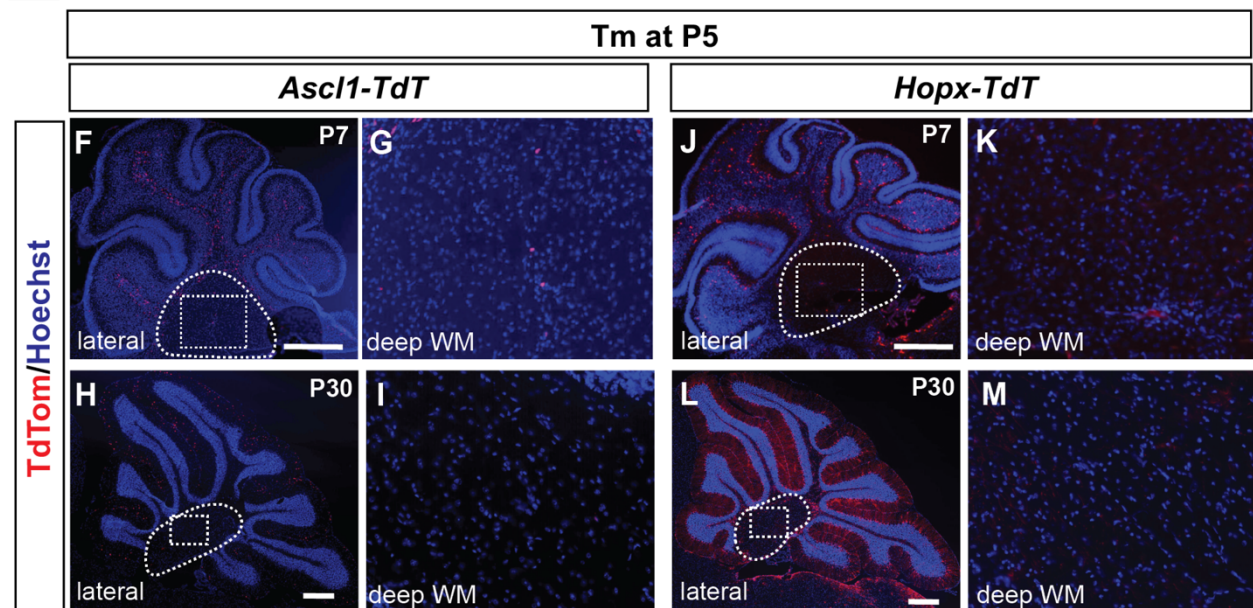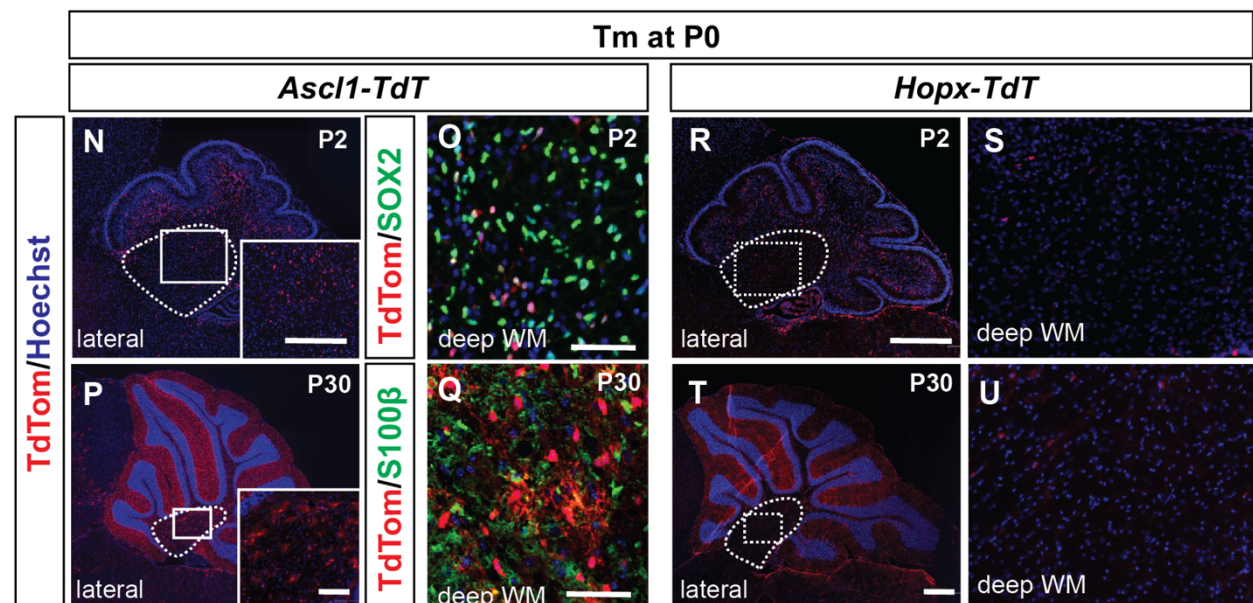



**Fig. S6. Genetic inducible fate mapping of *Hopx*<sup>+</sup> and *Ascl1*<sup>+</sup> NEPs and RNA *in situ* hybridization shows that the progeny of *Hopx*<sup>+</sup> and *Ascl1*<sup>+</sup> NEPs are restricted to lobules at P5, whereas *Ascl1*<sup>+</sup> NEPs give rise to astrocytes in the deep WM at P0.**

**A-B.** Analysis of P30 *Ascl1-TdT* (A) and *Hopx-TdT* (B) mice that were not given Tm show no ectopic labeling due to recombination. **C.** Schematics showing the level of sagittal levels in the medial and lateral cerebellum used for analysis. **D-E.** Allen Brain Atlas P4 RNA *in situ* hybridization data showing the expression patterns of marker genes in clusters identified by scRNA-seq in the medial (D) and the lateral (E) cerebellum. **F-M.** Analysis of sections of the lateral cerebellum and deep WM of *Ascl1-TdT* and *Hopx-TdT* mice that were given Tm at P5 and analyzed at P7 (F-G, J-K) and at P30 (H-I, L-M) shows no TdT<sup>+</sup> cells in the deep WM. **N-U.** Analysis of sections of the lateral cerebellum and deep WM of *Ascl1-TdT* and *Hopx-TdT* mice that were given Tm at P0 and analyzed at P2 (N-O, R-S) and at P30 (P-Q, T-U) shows TdT<sup>+</sup> cells in the deep WM only in the *Ascl1-TdT*<sup>+</sup> cerebella. *Ascl1-TdT*<sup>+</sup> cells are SOX2<sup>+</sup> at P2 (O) and show mostly astroglial morphology and are S100 $\beta$ <sup>+</sup> at P30 (Q). Scale bars: 500 $\mu$ m, O, Q: 50 $\mu$ m

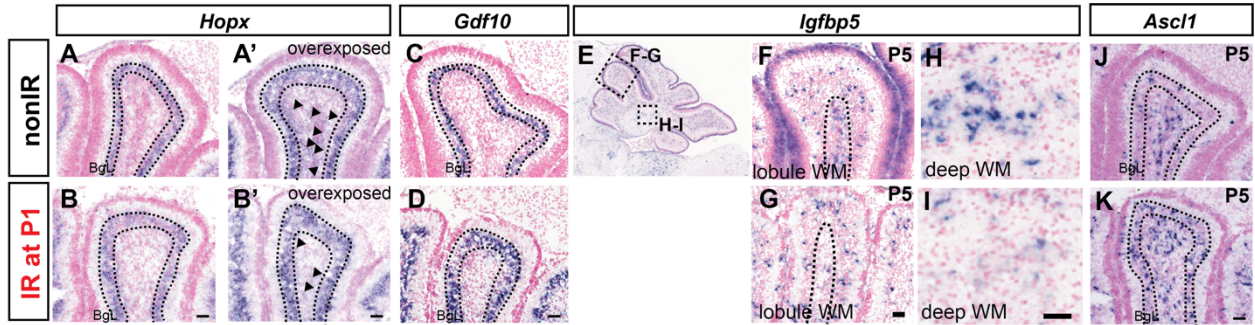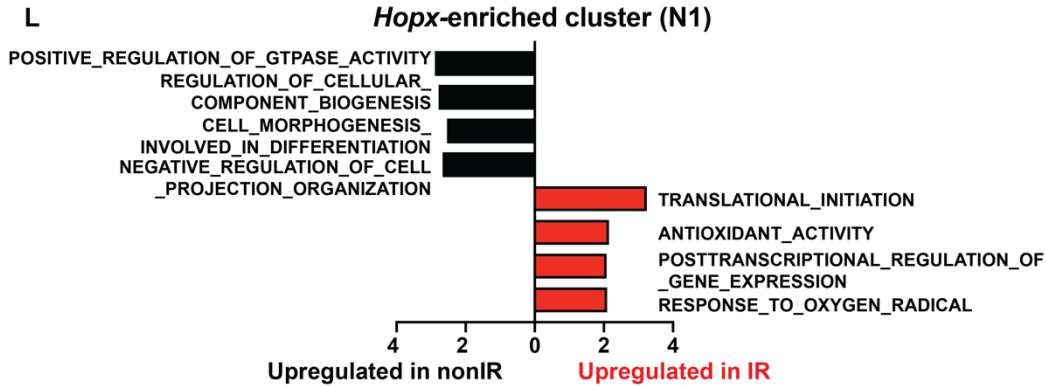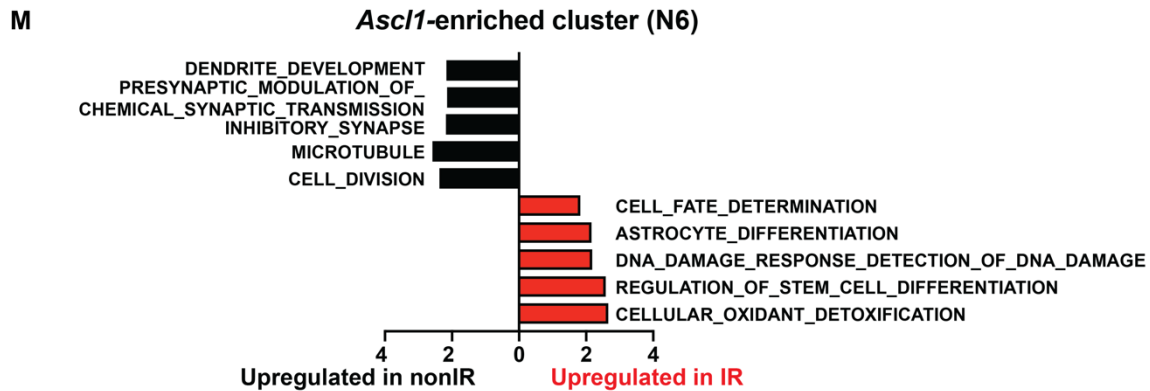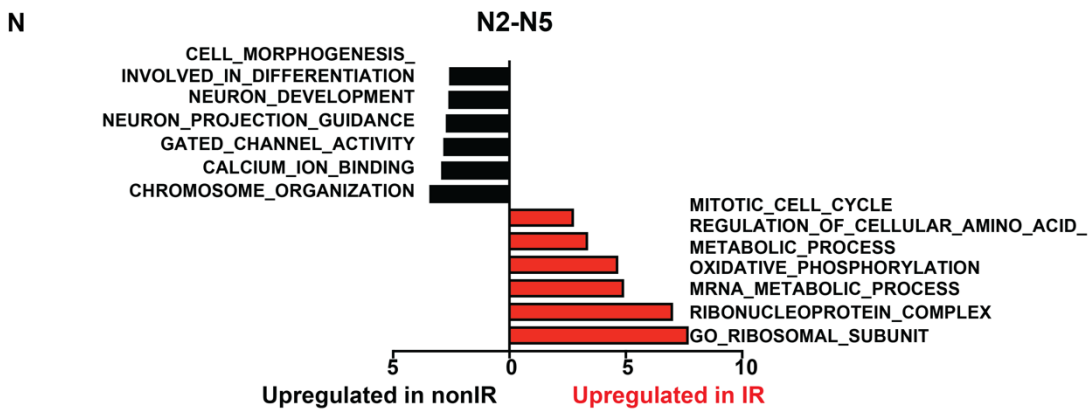

**Fig. S7. RNA *in situ* analysis of P5 nonIR and IR cerebella for NEP markers and GSEA analysis on differentially expressed genes between nonIR and IR cells within NEP subtypes show the injury induced changes in NEP subtypes. A-K.** RNA *in situ* analysis of P5 nonIR and IR brains for BgL-NEP (*Hopx*, *Gdf10*, A-D), WM-NEPs (*Igf1bp5*, E-I) and neurogenic-NEP (*Ascl1*, J-K) markers. **A'-B'.** Overexposed *Hopx* RNA *in situ* analysis shows the *Hopx*-expressing cells in the WM (arrowheads). **L-N.** GSEA analysis (NES $\geq$ 2, FDR $<$ 0.1) of differentially expressed genes between the nonIR and IR cells within the *Hopx*-enriched (N1, L), *Ascl1*-enriched (N6, M) clusters and clusters N2-5 (N) from Fig. 1. x-axis shows normalized enrichment score (NES). Scale bars: 50 $\mu$ m, BgL: Bergmann glia layer, WM: white matter

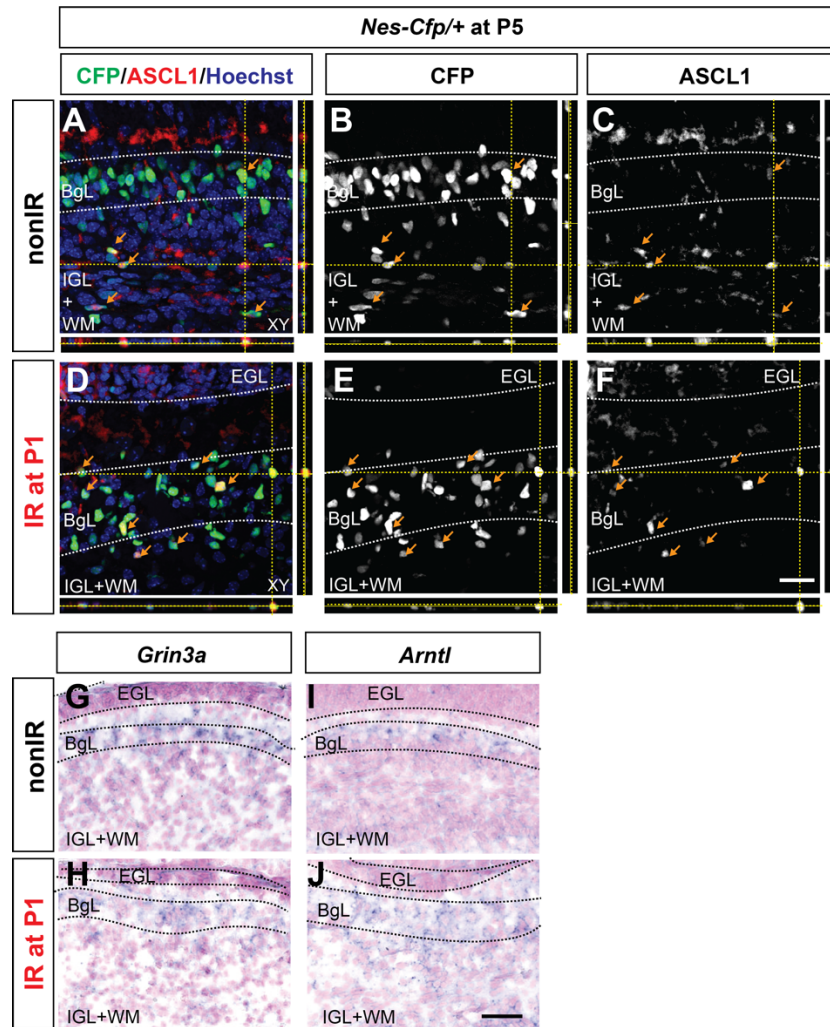

**Fig. S8. ASCL1 is ectopically expressed in the BgL upon irradiation and genes that are co-expressed with *Ascl1* in the IR NEPs are expressed in the BgL. A-F.** IF analysis of ASCL1 and CFP on cerebellar sections from P5 *Nes-Cfp/+* nonIR (A-C) or IR (D-E) cerebella. Orthogonal projections of confocal z-stacks are presented. Arrows show the ASCL1 and CFP double positive cells. **G-J.** RNA *in situ* hybridization for *Grin3a* (G-H) and *Arntl* (I-J) on cerebellar sections from P5 *Nes-Cfp/+* nonIR (G, I) or IR (H, J) cerebella. Scale bars: 50µm. EGL: external granule layer, ML: molecular layer, BgL: Bergmann glia layer, IGL: internal granule layer, WM: white matter

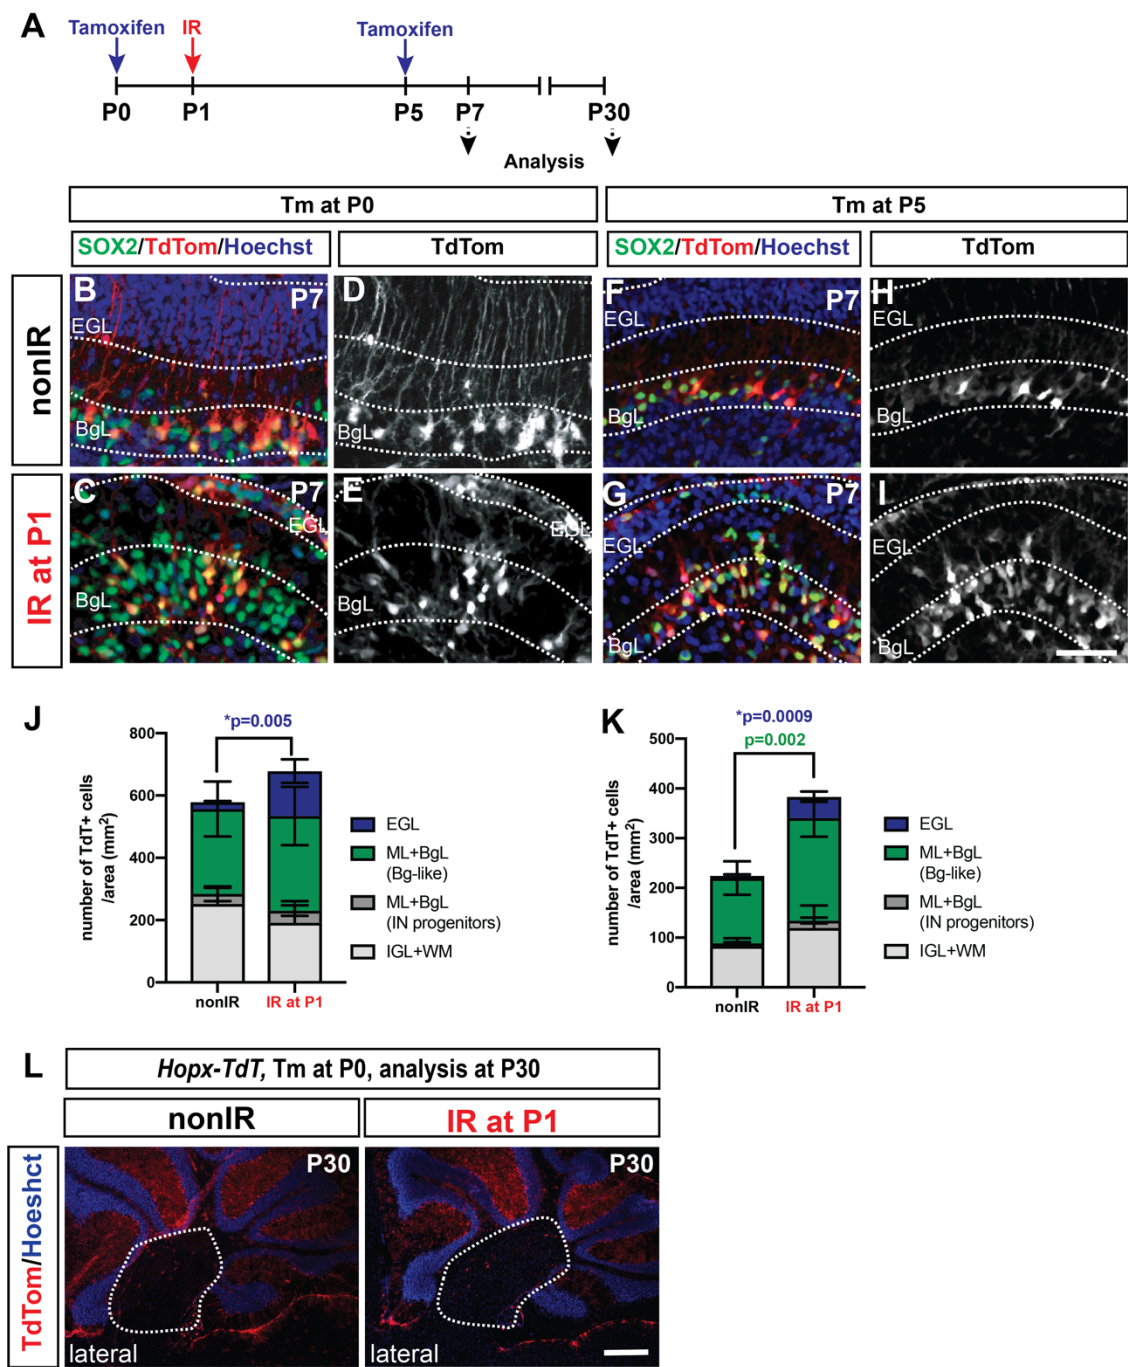

**Fig. S9.** *Hopx*-expressing NEPs migrate to external granule layer upon injury and do not generate astrocytes in the deep WM after irradiation. **A.** Experimental plan. **B-I.** IF analysis of P7 nonIR (**B, D, F, H**) and IR (**C, E, G, I**) *Hopx-TdT* brains that were given Tm at P0 (**B-E**) or at P5 (**F-I**). **J.** Quantification of the density of TdT+ cells in nonIR and

IR *Hopx-TdT* brains that were given Tm at P0, analyzed at P7 (n=3/condition, EGL: Student's t-test, p=0.005). **K.** Quantification of the density of TdT+ cells in nonIR and IR *Hopx-TdT* brains that were given Tm at P5, analyzed at P7 (n≥3/condition, Two-way ANOVA,  $F_{(1, 20)}=19.5$ , p=0.0003, \*EGL: Student's t-test, p=0.0009) **L.** Analysis of *Hopx-TdT* P30 nonIR and IR mice at P1 shows no TdT+ cells in the deep WM of the lateral cerebellum. Scale bars: B-I: 50μm, J: 500μm



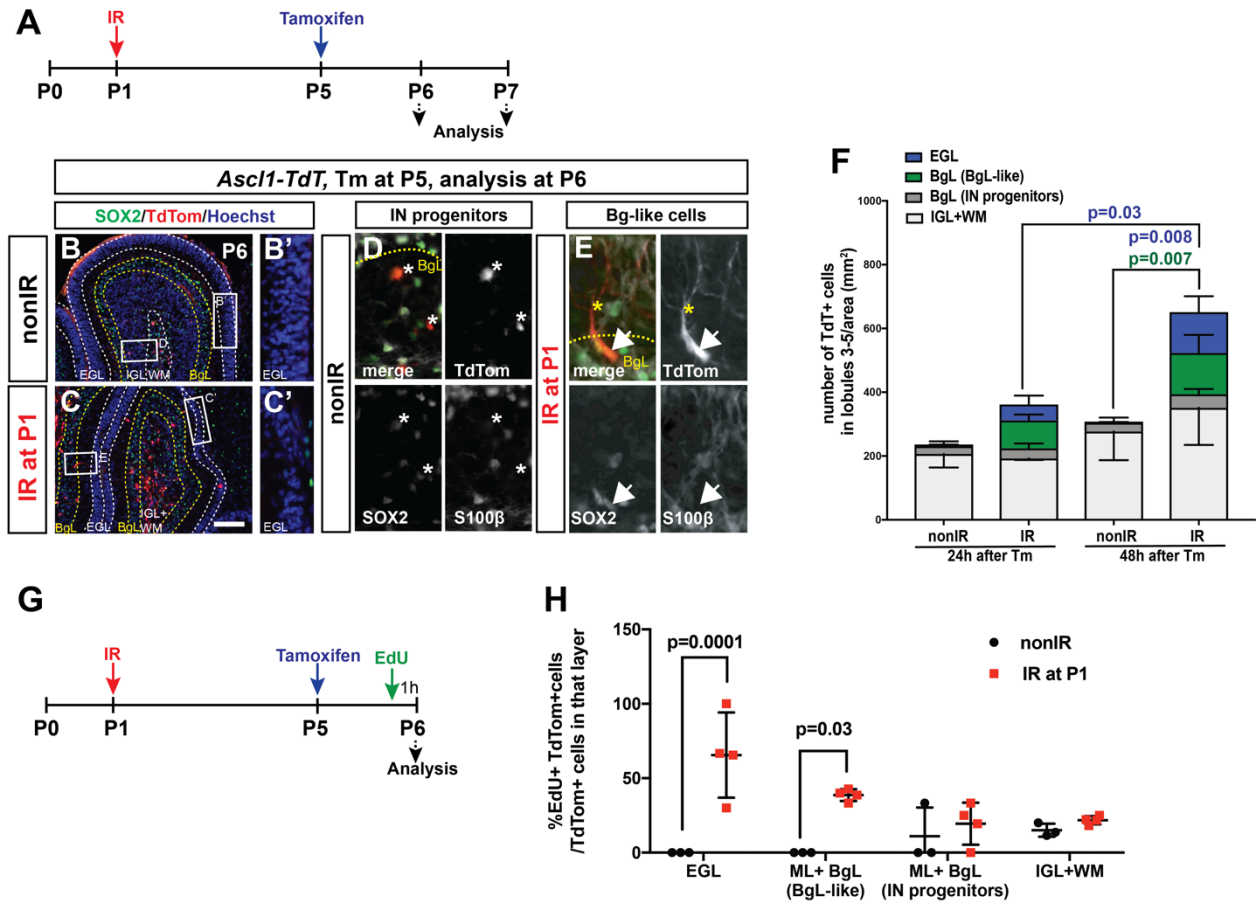

**Fig. S10. A Proliferative transitory *Ascl1*+ BgL-NEP emerges upon injury. A, G.** Experimental plan. **B-E.** IF analysis of *Ascl1-TdT* brains at P6 (24h after Tm at P5). Insets in B' and C' show the EGL and the insets in D and E show migrating interneuron progenitors (asterisks; D) and a SOX2+ S100β- BgL-like *Ascl1-TdT* cell (arrows; E), respectively. Yellow asterisks show the pial projection of the TdT+ cells. **F.** Quantification of the density of the TdT+ cells in the different layers of the cerebellum at P6 and P7 in nonIR and IR *Ascl1-TdT*+ mice given Tm at P5 (BgL-like cells were identified by their pial projections (n=4, Two-way ANOVA, all layers:  $F_{(3,32)}=12.89$ ,  $p<0.0001$ , EGL:  $F_{(1,8)}=23.75$ ,  $p=0.001$ ). **H.** Quantification of the percentages of EdU+ TdT+ cells per all TdT+ cells in each layer in *Ascl1-TdT* animals at P6 in nonIR and IR P1 pups shows that the



neurogenic-NEPs at steady state and the TdT+ BgL-NEPs and the TdT+ cells in the external granule layer cells are proliferative upon irradiation (n=3 for nonIR and n=4 for IR, Two-way ANOVA,  $F_{(3,20)}=31.28$ ,  $p<0.0001$ ). Scale bars: 100 $\mu$ m, EGL: external granule layer, ML: molecular layer, BgL: Bergmann glia layer, IGL: internal granule layer, WM: white matter

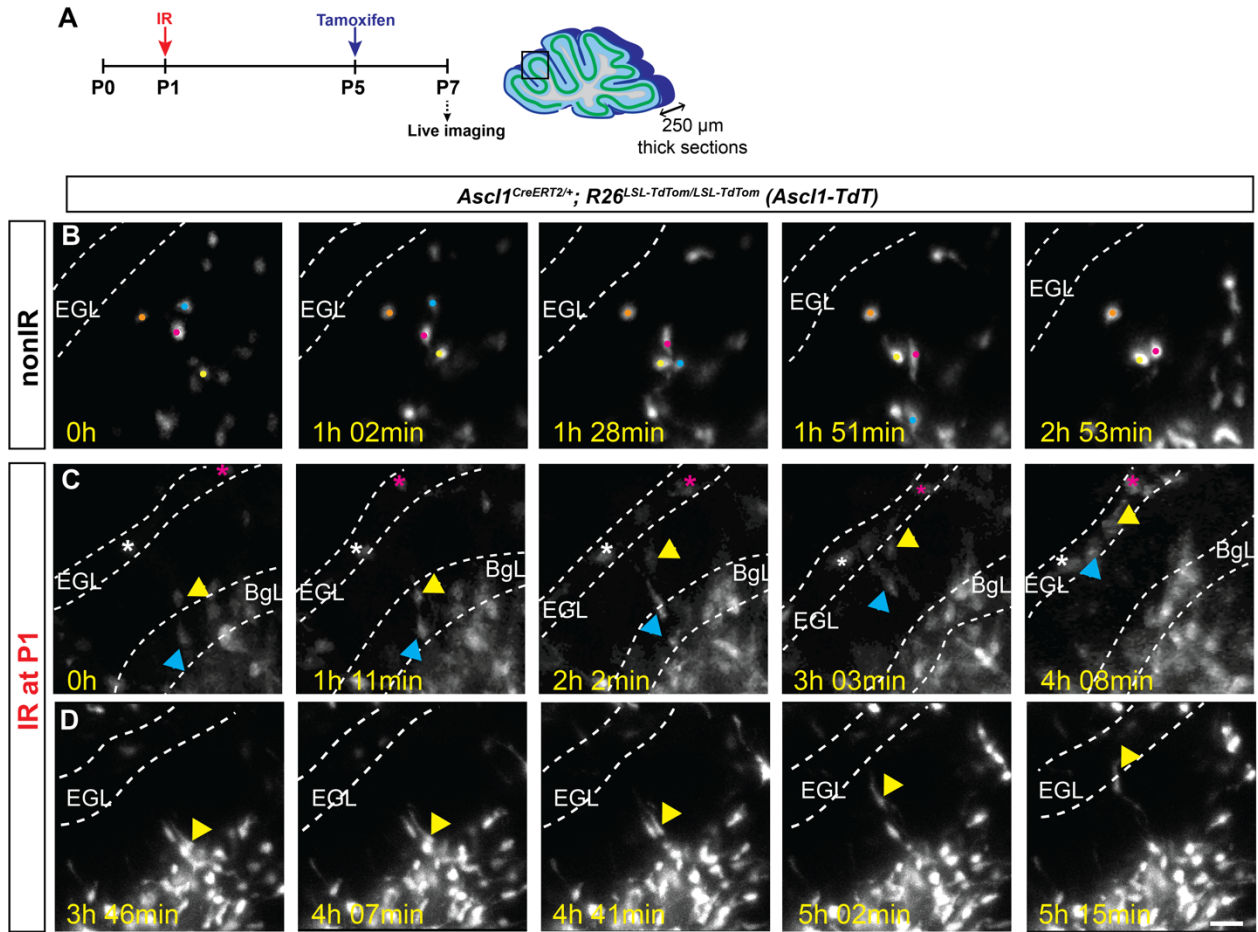

**Fig. S11.** Time lapse images showing *Ascl1-TdT*<sup>+</sup> BgL-NEPs migrating to external granule layer after IR. **A.** Schematic of the experimental plan. **B-D.** Examples of time-lapse live images of TdT<sup>+</sup> cells from cerebellar sections obtained from P7 nonIR (B) or IR (C-D) *Ascl1-TdT* pups. Scale bars: 25 $\mu$ m, EGL: external granule layer

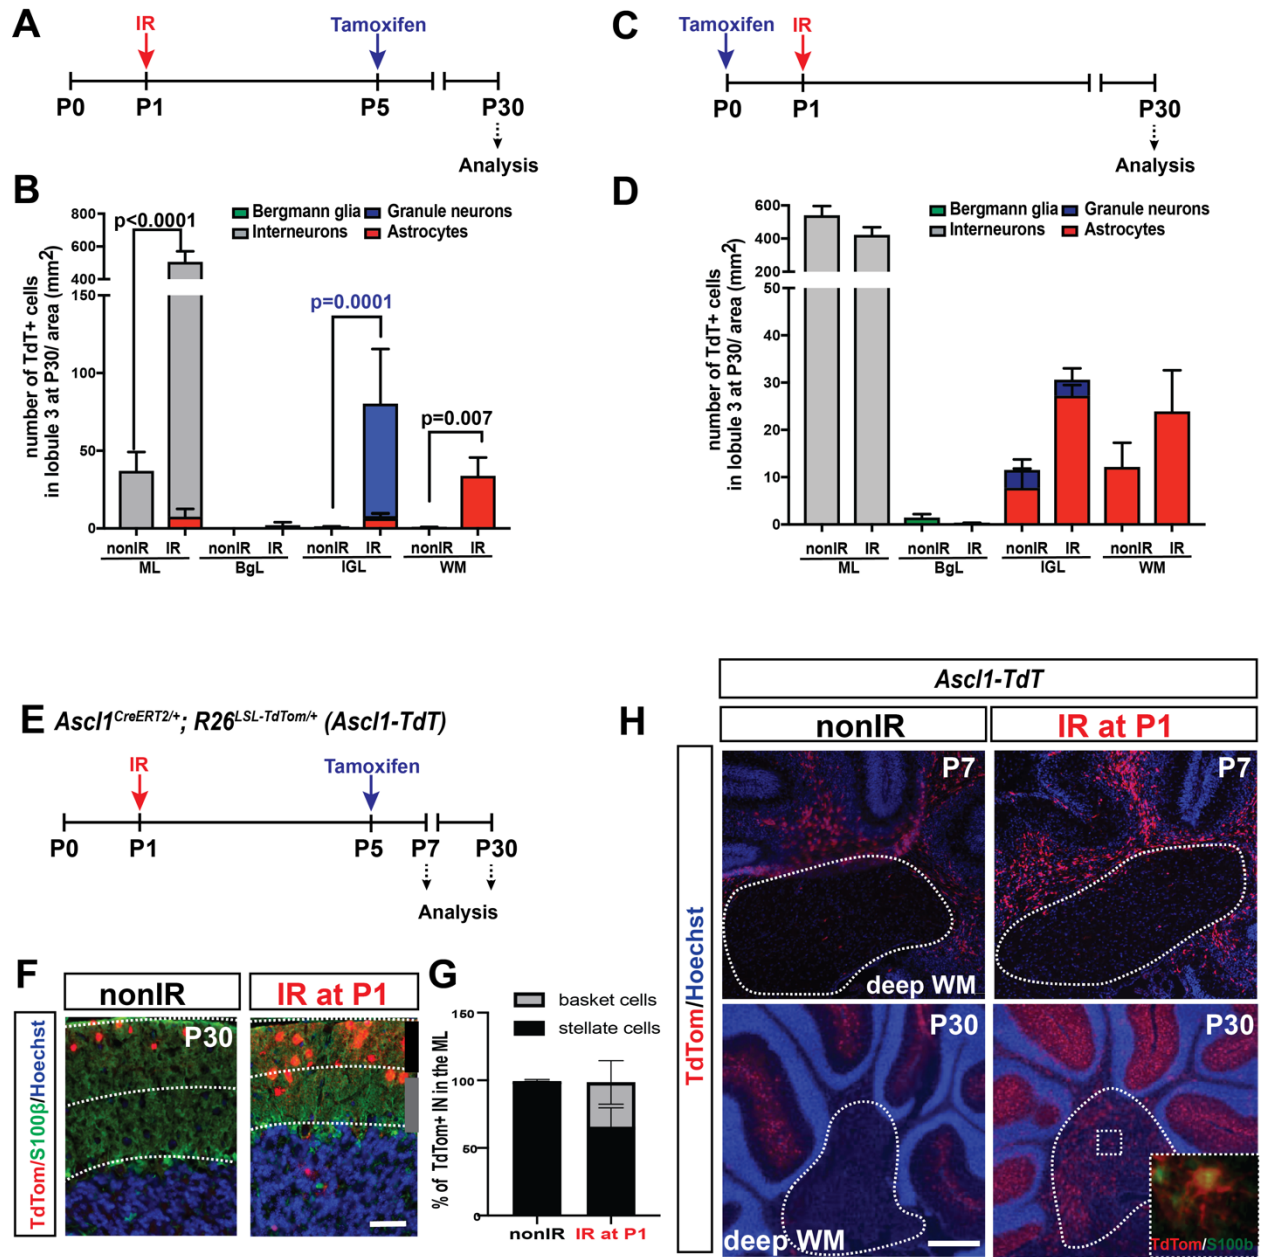

**Fig. S12. *Ascl1*-TdT<sup>+</sup> cells give rise to granule cells, ML interneurons and WM astrocytes when labelled after the injury but not before. A, C, E. Schematics explaining the timelines of the experiments. B, D. Quantification of the density of the TdT<sup>+</sup> cells by cell type when Tm is administered at P5 (B) or at P0 (D) in the different layers of the cerebellum of P30 nonIR and IR *Ascl1-TdT* animals (B: n=3/condition, Two-way ANOVA,  $F_{(7,14)}=137.9$ ,  $p<0.0001$ , WM astrocytes: Student's t-test,  $p<0.007$ , D:**

n $\geq$ 3/condition, Two-way ANOVA,  $F_{(7,83)}=275.4$ ,  $p<0.0001$ ). **E.** Experimental plan. **F-G.** IF analysis of the TdT+ cells in the ML of the P30 nonIR and IR *Asc11-TdT* animals (F) and the quantification of the proportions of Basket neurons (early born, lower ML) and Stellate neurons (later born, upper ML) shows a delay in the production of ML interneurons in the mice irradiated at P1. **H.** IF analysis of the lateral cerebellum of nonIR and IR at P1 *Asc11-TdT* animals shows TdT+ astrocytes in the deep WM (S100 $\beta$ +) at P30 but not at P6, suggesting the cells migrate from the lobule WM. Scale bars: 500 $\mu$ m, except for F: 50 $\mu$ m

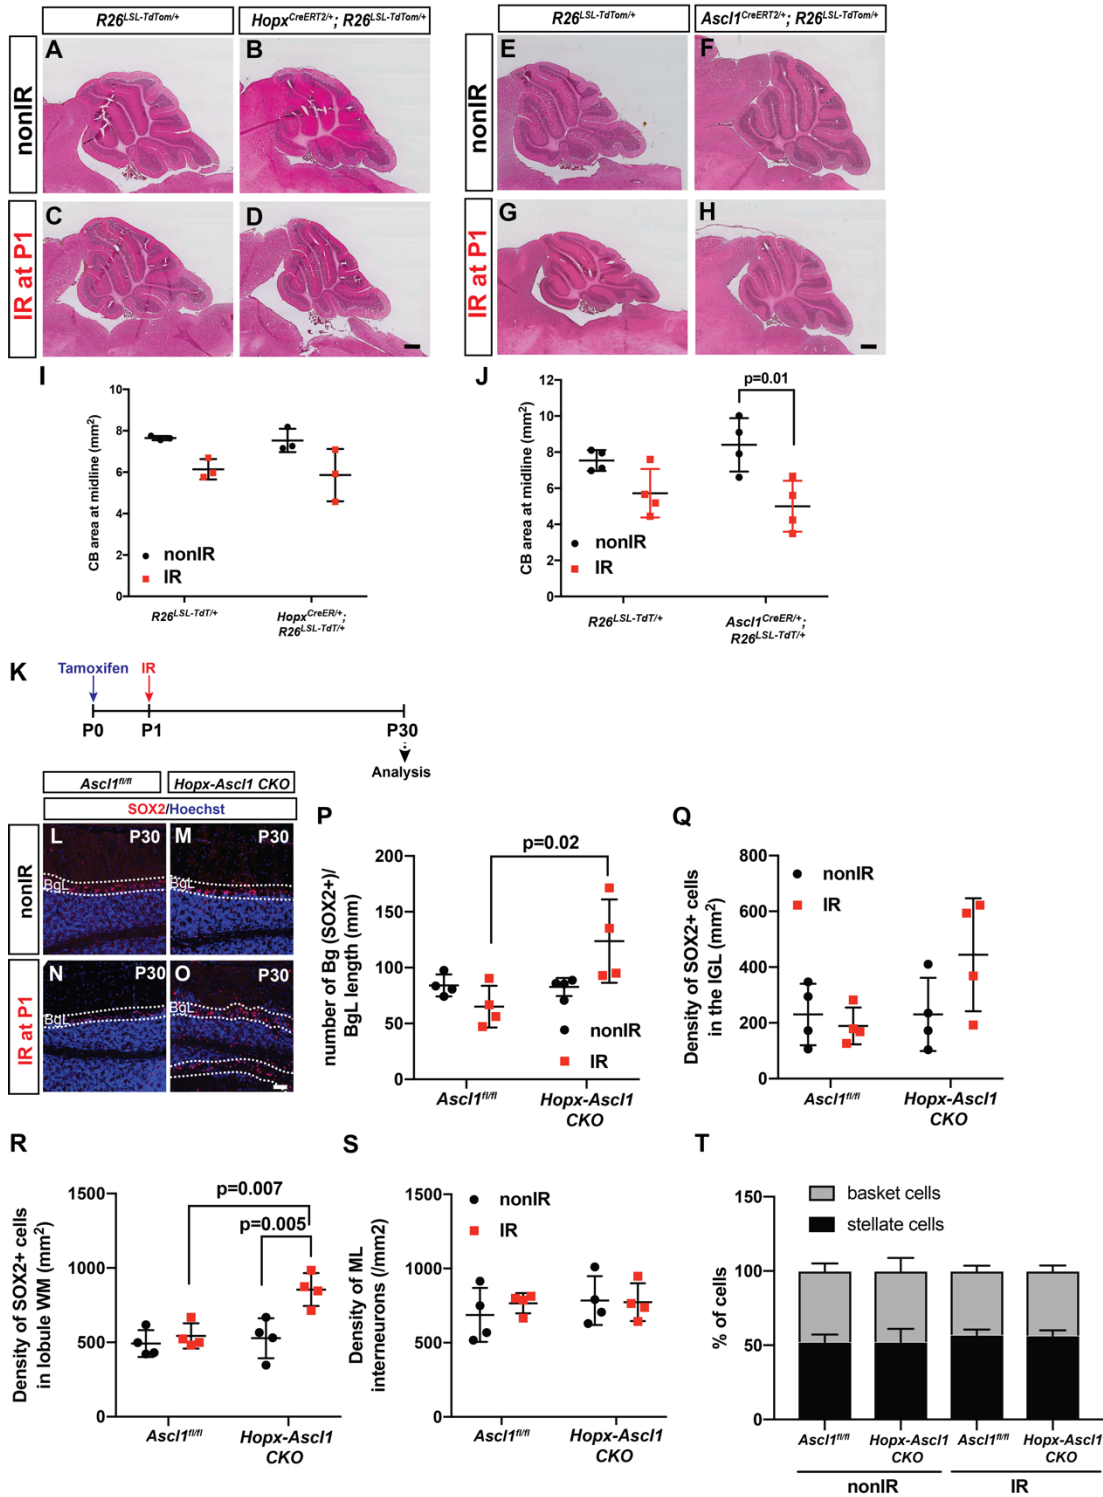

**Fig. S13. Loss of *Ascl1* in *Hopx*-NEPs increases Bg and astrocyte production upon irradiation but does not alter ML interneuron density. A-J.** H&E analysis and the quantification of the cerebellar area at the midline of nonIR and IR, Cre<sup>+</sup> and Cre-

littermates of *Hopx-TdT* (A-D, I, n=3/condition, Two-way ANOVA,  $F_{(1,4)}=13.41$ ,  $p=0.02$ ) and *Ascl1-TdT* (E-H, J, n=4/condition, Two-way ANOVA,  $F_{(1,12)}=17.26$ ,  $p=0.001$ ) animals at P30. **K.** Experimental plan. **L-O.** IF analysis of control and *Hopx-Ascl1* CKO nonIR and IR animals at P30 for SOX2 (Bg and astrocytes). **P-R.** Quantification of the density of SOX2+ Bg (P, n=4/condition, Two-way ANOVA,  $F_{(1,12)}=6.878$ ,  $p=0.02$ ), and density of astrocytes in the IGL (Q, n=4/condition, Two-way ANOVA,  $p=0.086$ ), and lobule WM (R, n=4/condition, Two-way ANOVA,  $F_{(1,12)}=10.56$ ,  $p=0.007$ ). **S-T.** Quantification of ML interneuron density (S, n=4/condition, Two-way ANOVA,  $p=0.4$ ) and the distribution of Basket vs. Stellate neurons (T, n=4/condition) in nonIR and IR *Hopx-Ascl1* CKO animals and control littermates shows no differences. Scale bars: A-H: 500 $\mu$ m, L-O: 100 $\mu$ m, BgL: Bergmann glia layer

## List of Tables and Additional Supplementary Materials

**Movie 1.** Live imaging of the lobule 3 of a P7 nonIR *Ascl1-TdT* cerebellum that was given Tm at P5. Outline shows external granule layer. Time lapse images are shown in Fig. S8.

**Movie 2.** Live imaging of the lobule 3 of a P7 IR *Ascl1-TdT* cerebellum that was IR at P1 and given Tm at P5. Outline shows external granule layer. Time lapse images are shown in Fig. S8.

**Table S1.** Binomial test results showing the cell-type specific genes of the clustering analysis shown in Figs. 1, 3, S1.

**Table S2.** Differential expression analysis amongst N1 and N6 (related to Fig. S2).

**Table S3.** Summary of the distribution of the TdT+ cells after long term GIFM in *Ascl1-TdT* brains that were given Tm at P0 or P5 (related to Fig. 2).

**Table S4.** Summary of the distribution of the TdT+ cells after long term GIFM in *Hopx-TdT* brains that were given Tm at P0 or P5 (related to Fig. 2).

**Table S5.** Summary of the results of GIFM in *Ascl1-TdT* and *Hopx-TdT* brains in the deep white matter (related to Figs. S6, S9, S12)

**Table S6.** GSEA results of the differentially expressed genes between the nonIR and IR N1 *Hopx+* NEPs and N6 *Ascl1+* NEPs and NEPs in clusters N2-5 (related to Fig. S7)

**Table S7.** Differential expression analysis between nonIR and IR cells in cluster N1 *Hopx+* NEPs and N6 *Ascl1+* NEPs (related to Fig. 3, Fig. S5)

**Table S8.** Top genes that are co-expressed with *Ascl1* in nonIR and IR cells (related to Fig. 3)



**Table S9.** Summary of the distribution of the TdT+ cells after long term genetic inducible fate mapping in nonIR and IR *Ascl1-TdT* brains that were given Tm at P0 or at P5 (related to Fig. 5)

**Table S10.** List of antibodies.

**Table S11.** Sequences complementary to the probes used for RNA *in situ* hybridization.

**Table S12.** Summary of the statistics.

## Tables

**Table S3.** Summary of the distribution of the TdT+ cells after long term genetic inducible fate mapping in *Ascl1-TdT* brains that were given Tm at P0 or at P5 (related to Fig. 2)

| Cell type          | % cells in TdT+ cells at P30 |                |
|--------------------|------------------------------|----------------|
|                    | Tm at P0 (n=4)               | Tm at P5 (n=3) |
| Granule cells      | 0.66 ± 0.48                  | 0 ± 0          |
| ML Interneurons    | 95.10 ± 2.34                 | 97.01 ± 4.45   |
| Bergmann glia      | 0.26 ± 0.13                  | 0 ± 0          |
| IGL Astrocyte      | 1.37 ± 0.83                  | 0.92 ± 1.61    |
| WM Astrocyte       | 2.15 ± 1.06                  | 0.99 ± 1.55    |
| WM oligodendrocyte | 0.46 ± 0.15                  | 1.06 ± 1.31    |

**Table S4.** Summary of the distribution of the TdT+ cells after long term genetic inducible fate mapping in *Hopx-TdT* brains that were given Tm at P0 or at P5 (related to Fig. 2)

| Cell type          | % cells in TdT+ cells at P30 |                |
|--------------------|------------------------------|----------------|
|                    | Tm at P0 (n=3)               | Tm at P5 (n=3) |
| Granule cells      | 2.03 ± 1.33                  | 1.06 ± 0.07    |
| ML Interneurons    | 31.23 ± 1.31                 | 1.09 ± 0.29    |
| Bergmann glia      | 51.02 ± 3.26                 | 70.37 ± 2.71   |
| IGL Astrocyte      | 10.53 ± 1.20                 | 20.3 ± 3.10    |
| WM Astrocyte       | 4.11 ± 1.02                  | 5.27 ± 1.08    |
| WM oligodendrocyte | 0.84 ± 0.42                  | 1.26 ± 0.99    |
| Purkinje cells     | 0.23 ± 0.40                  | 0.65 ± 0.26    |

**Table S5.** Summary of the results of GIFM in *Ascl1-TdT* and *Hopx-TdT* brains in the deep white matter.

| GIFM results in the deep WM |          | Tm at P0        |                                             | Tm at P5        |                                             |
|-----------------------------|----------|-----------------|---------------------------------------------|-----------------|---------------------------------------------|
|                             |          | 2 days after Tm | P30                                         | 2 days after Tm | P30                                         |
| <i>Hopx-TdT</i>             | nonIR    | no labelling    | no labelling                                | no labelling    | no labelling                                |
|                             | IR at P1 | no labelling    | no labelling                                | no labelling    | no labelling                                |
| <i>Ascl1-TdT</i>            | nonIR    | SOX2+ cells     | Mostly astrocytes and rare oligodendrocytes | no labelling    | no labelling                                |
|                             | IR at P1 | SOX2+ cells     | Mostly astrocytes and rare oligodendrocytes | no labelling    | Mostly astrocytes and rare oligodendrocytes |

**Table S9.** Summary of the distribution of the TdT+ cells after long term genetic inducible fate mapping in nonIR and IR *Ascl1-TdT* brains that were given Tm at P0 or at P5 (related to Fig. 5)

| Cell type       | % cells in TdT+ cells at P30 |                |                |                |
|-----------------|------------------------------|----------------|----------------|----------------|
|                 | Tm at P0 (n=3)               |                | Tm at P5 (n=3) |                |
|                 | nonIR (n=4)                  | IR at P1 (n=3) | nonIR (n=5)    | IR at P1 (n=4) |
| ML Interneurons | 95.41 ± 2.36                 | 88.58 ± 0.79   | 96.28 ± 4.75   | 81.23 ± 4.57   |
| Granule cells   | 0.69 ± 0.48                  | 0.69 ± 0.41    | 1.0 ± 1.4      | 11.83 ± 2.00   |
| Bergmann glia   | 0.26 ± 0.13                  | 0.04 ± 0.03    | 0 ± 0          | 0.35 ± 0.29    |
| IGL Astrocyte   | 1.42 ± 0.83                  | 5.75 ± 0.76    | 0.95 ± 1.60    | 1.06 ± 0.61    |
| WM Astrocyte    | 2.21 ± 1.06                  | 4.94 ± 1.51    | 1.04 ± 1.55    | 5.52 ± 1.86    |

**Table S10.** List of antibodies

| Target             | Catalog Number | Company             | Dilution                       |
|--------------------|----------------|---------------------|--------------------------------|
| goat α-SOX2        | AF2018         | R&D System          | 1/200 (adult)-<br>1/500 (pups) |
| rabbit α-PAX2      | 71600          | Invitrogen          | 1/500                          |
| rabbit α-PAX6      | AB2237         | Millipore           | 1/500                          |
| rat α-GFP (CFP)    | 04404-84       | Nacalai Tesque      | 1/1000                         |
| mouse α-ASCL1      | 556604         | BD Pharmingen       | 1/1000                         |
| guinea pig α-PVALB | 195-004        | Synaptic Systems    | 1/1000                         |
| rabbit α-S100B     | Z0311          | DAKO                | 1/1000                         |
| mouse α-NeuN       | MAB3777        | Millipore           | 1/1000                         |
| rabbit α-HOPX      | HPA030180      | Sigma (Prestige Ab) | 1/1000                         |

**Table S11.** Sequences complementary to the probes used for RNA *in situ* hybridization.

| <b>Gene</b>   | <b>Sequence (5'-3')</b>                                                                                                                                                                                                                                                                                                                                                                                                                                                                                                                                                                                                                                                                                                                                                                                    |
|---------------|------------------------------------------------------------------------------------------------------------------------------------------------------------------------------------------------------------------------------------------------------------------------------------------------------------------------------------------------------------------------------------------------------------------------------------------------------------------------------------------------------------------------------------------------------------------------------------------------------------------------------------------------------------------------------------------------------------------------------------------------------------------------------------------------------------|
| <b>Hopx</b>   | TCTAGATAACCCTCACTAAAGATCTCCGGAGGCAGCACTTGAGGCGCTTCCTCAGTATACTGTCCCCTCGGAGTGTCAAGCGGGAGGCGTCTTCTCCTCCTCCTCCATCCTTAGTCAGACGCGCACGGACCATGTCGGCGCAGACCAGCGAGCGGCCCACGGAGGACCAAGTGGAGATCCTGGAGTACAACCTCAACAAGGTCAACAAGCACCCGGACCCACCACGCTGTGCCTCATCGCAGCCGAGGCGGGTCTCACGGAGGAGCAGACGCAGAAATGGTTAAGCAGCGCCTGGCAGAGTGGCGGGCGGTGAGAAGGCTTGCCCTTCGGAATGCAGATCTGTTACGGACTAGGGAGCCAGGCCCTTGAGCTTGCTCTTGAACCTCATCTTCTTCCCTCGGCTTACCCTATAGTGCACCTAAATCCCGGG                                                                                                                                                                                                                                                                                                                                                             |
| <b>Gdf10</b>  | GTTCCAGACAAGATGAACTCCCTTGGAGTCCCTTTCTGGATGAAAATCGGAATGCGGTTCTGAAGGTGTACCCCAATATGTCCGTAGAGACCTGTGCCTGTGCGGTAAGATGGCTTCAAGATAGAAGACAGACCTGCTTCATCCCTGCCCTGCAGAGTGGCAATCTTGGAGCCAGGGCTTACTCGGGGAGGTTCCAGGTGTAGACAGAGCTTACAGGCAGCCCTGCTGGGACCAA GAAAGATCTGCCACCACATCGCAATTCTCAGTTCCTCCGTGCTGGTGGTAGCTCTGTAAGACGTGTTGAGTTCCTGG AAGAAATCTGGAATTAAGTGTGGTCTGCAATTTGCCATCATCCCTGCCACACTTTTCAAGGCTAGAAATAACGTGTGT CCTCAAATGTCAAC                                                                                                                                                                                                                                                                                                                                                                                    |
| <b>Igfbp5</b> | ACCACCACCCCAATCTGACCCGATCCCGCCTGGGGGTTTCTACGGTCTCCGCTCGCTCTGCGTGCACCTGGCGCGC CTCTTTTTTTCACCCCAACCTGTTGCAAGTCTTTAATCCTCGCAATTGGGACTTGCGTGCAGGCATCTGAATCCTCCTTG CCTCATATTTTGAAGTGTGGGGGAGAGCACCTGCTCTACCTGCAAGAGATTTAAAGGAAAAAATCTCCAGGCTCC CTCTTTCTCCACACACTCTCGCTCTCCTGCCCCGCCCGAGGTAAGCCAGACTCCGAGAAAAATGGTATCAGCGTGGT CCTCCTGCTGCTGGCCGCTATGCCGTACCGGCTCAAGGCTGGGTTCTTTGTCGACTGTGAACCTGCGACGAGAAA GCTCTGTCCATGTGTCCCCCAGCCCTCTGGGCTGTGAGCTGGTCAAAGAGCCCGGCTGTGCCTGCTGCATGACTTGC GCCCTGGCGGAGGACAGTCTGTGCGTCTACACGGAGCGCTGCGCCAGGGTTTGCCTGCGCTGCCCTCCCCGGCAGGA TAGAGAGAGAGACTCTCGGGAACACGAGGAACCCACCCTCCGAGATGGCTGAAGAGACCTACTCCCCAAGGTCTTC CGGCCAAGCACACTCGCATTTCGAGCTGAAGGCTGAGGCTGTGAAGAAGGACCGCAGAAAGAGCTGACCCAGTCC AAGTTTTGTTTTGGGGGTGACAGAACTGCCCACCCAGAGTCATCCCTGCACCTGAGATGAGACAGGAATCCGAACAA GGC |
| <b>Grin3a</b> | CATCGTCAGCTCAGAAAAACAATTTTTATCTGGAAGTGTGAGTATGACCCATGGAAGCCATGTGGACTCGCCTGG GTAGCTGGCAAGGGGGAAGGATTGTATGACTCGGGAATATGGCCAGAGCAGGCCAGAGGCACAAAACCCACTTCC ATCACCCAAACAAGTTACACTTGAGAGTGGTGACACTGATTGAACATCCATTTGTTTTACAGAGAGAAGTAGATGATGAAG GCTTATGCCCTGCTGGACAACCTGTCTAGACCCTATGACTAATGACTCTTCCATACTGGATAGCCTGTTTAGCAGCCTAC ATAGCAGTAATGATACAGTGCCAATCAAGTTCAAGAAGTGTGCTATGGGTATTGCATTGATCTACTGGAACAGTTAGCA GAAGACATGAACTTTACTTTGACCTTATATTGTAGGGATGGAAGTATGGAGCTTGGAAAAATGGTCACTGGACTGG GCTGGTTGGTATCTCCTGAGTGGAACAGCCAACATGGCAGTCACTTCTTTCAGCATCAATACTGCAAGAAGCCAAGTGA TAGATTTACCAGCCCTTCTTCTCAACCAGTTTGGGCATCTTAGTGAGGA                                                                                                                                                                                  |
| <b>Arntl</b>  | CAACCTCAGCTGCCTGTTGCAATCGGGCGCCTGCACTCGCACATGGTTCCACAACCAGCGAACGGGGAAATACGGGT GAAATCTATGGAGTACGTTTCTGCACACGCAATAGATGGGAAATTTGTTTTGTAGATCAGAGGGCGACAGCTATTTTGG CGTATCTACCACAGGAACTTCTAGGTACATCATGTTATGAGTATTTTCATCAAGACGACATAGGACACCTCGCAGAAATGTC ACAGGCAAGTTTTACAGACAAGAGAAAAGATCACGACTAATTGCTATAAGTTAAGATCAAAGATGGTTCTTTTATCACGC TACGAAGTCGATGGTTGAGTTTATGAACCCGTGGACCAAGGAAGTTGAATACATTGTCTCAACCAACACTGTTGTTTTAG CCAATGTCTGGAAGGCGGGACCCAACTTCCCGCAGCTAACAGCACCCCCACAGCATGGACAGCATGCTGCCCT CTGGAGAAGGTGGCCAAAGAGGACTCATCCACTGTCCAGGCATTCCAGGGGAAACCAGAGCCGGAGCAGGAAAAA TAGGTCGAATGATCGCCGAGGAAATCATGAAATCCACAGGATAAGAGGGTTCATCGCCTTCCAGCTGTGGCTCCAGCCC GCTGAACATCACAAGTACGCCTCCCCTGATGCCTTCTCAGGAGGCAAGAAGATTCTAAATGGAGGGACTCCAGAC ATTCTTCCACTGGACTATTACCAGGGCAGGCTCAGGAGACCCAGGGTA                      |

**Table S12.** Summary of the statistics performed.

| Figure      | Test Performed                     | p-value                                                         | Multiple comparisons                               |            |
|-------------|------------------------------------|-----------------------------------------------------------------|----------------------------------------------------|------------|
| Figure 3B   | Two-way ANOVA                      | $F_{(1,15)}=25.75$ ,<br>$p=0.0001$                              | P5                                                 | $p=0.001$  |
| Figure 4D   | Two-way ANOVA                      | All layers:<br>$F_{(7,42)}=8.718$ ,<br>$p<0.0001$               | Granule neurons<br>IGL nonIR vs. IGL<br>IR         | $p=0.004$  |
| Figure 4G   | Two-way ANOVA                      | All layers:<br>$F_{(1,14)}=5.047$ ,<br>$p=0.04$                 | Granule neurons<br>IGL nonIR vs. IGL<br>IR         | $p=0.04$   |
| Figure S9J  | Two-tailed Student's t-test        | EGL: $t=5.5$ ,<br>$df=4$<br>$p=0.005$                           | N/A                                                |            |
| Figure S9K  | Two-way ANOVA                      | $F_{(1,20)}=19.5$ ,<br>$p=0.0003$                               | ML+BgL                                             | $p=0.002$  |
| Figure S9K  | Two-tailed Student's t-test        | EGL: $t=7.05$<br>$df=5$<br>$p=0.0009$                           |                                                    |            |
| Figure S10F | Two-way ANOVA                      | All layers:<br>$F_{(3,32)}=12.89$ ,<br>$p<0.0001$               | EGL 48h<br>nonIR vs. IR                            | $p=0.008$  |
|             |                                    |                                                                 | BgL 48h<br>nonIR vs. IR                            | $p=0.007$  |
| Figure S10F | Two-way ANOVA                      | EGL only:<br>$F_{(1,8)}=5.94$ ,<br>$p=0.04$                     | 24h IR vs.<br>48h IR                               | $p=0.03$   |
|             |                                    |                                                                 | 48h nonIR<br>vs. 48h IR                            | $p=0.003$  |
| Figure S10H | Two-way ANOVA                      | treatment:<br>$F_{(3,20)}=31.28$ ,<br>$p<0.0001$                | EGL                                                | $p=0.0001$ |
|             |                                    |                                                                 | ML+BgL                                             | $p=0.03$   |
| Figure S12B | Two-way ANOVA                      | By layer and<br>condition<br>$F_{(7,14)}=137.9$ ,<br>$p<0.0001$ | ML+BgL<br>(BgL-like)                               | $p=0.03$   |
|             |                                    |                                                                 | Granule<br>neurons<br>IGL nonIR<br>vs. IGL IR      | $p=0.0001$ |
|             |                                    |                                                                 | Astrocyte<br>WM nonIR<br>vs. WM IR                 | $p=0.2$    |
| Figure S12B | Student's t-test for WM astrocytes | $t=4.966$ ,<br>$df=4$ , $p=0.007$                               | N/A                                                |            |
| Figure S12D | Two-way ANOVA                      | $F_{(7,83)}=275.4$<br>$p<0.0001$                                | Post hoc multiple comparisons are not significant. |            |

|             |                             |                                                                                                                    |                                                    |           |
|-------------|-----------------------------|--------------------------------------------------------------------------------------------------------------------|----------------------------------------------------|-----------|
| Figure 6M   | Two-tailed Student's t-test | t=5.83, df=4<br>p=0.004                                                                                            | N/A                                                |           |
| Figure 6N   | Two-way ANOVA               | F <sub>(1,8)</sub> =7.928,<br>p=0.02                                                                               | SOX2 IR vs. ASCL1 IR                               | p=0.02    |
|             |                             |                                                                                                                    | ASCL1 nonIR vs. ASCL1 IR                           | p=0.002   |
| Figure 7J   | Two-way ANOVA               | by treatment:<br>F <sub>(1,19)</sub> =78.43,<br>p<0.0001<br>by genotype:<br>F <sub>(1,19)</sub> =14.39,<br>p<0.001 | control nonIR vs. IR                               | p=0.0003  |
|             |                             |                                                                                                                    | mutant nonIR vs. IR                                | p<0.0001  |
|             |                             |                                                                                                                    | control IR vs. mutant IR                           | p=0.004   |
| Figure 7S   | Two-way ANOVA               | by treatment:<br>F <sub>(1,10)</sub> =13.11,<br>p=0.005<br>by genotype:<br>F <sub>(1,10)</sub> =16.41,<br>p=0.002  | Control nonIR vs. IR                               | p=0.004   |
|             |                             |                                                                                                                    | Control IR vs. mutant IR                           | p=0.001   |
| Figure 7T   | Two-way ANOVA               | by treatment:<br>F <sub>(1,15)</sub> =9.134,<br>p=0.009<br>by genotype:<br>F <sub>(1,15)</sub> =58.49,<br>p<0.0001 | control nonIR vs. IR                               | p=0.00001 |
|             |                             |                                                                                                                    | mutant nonIR vs. IR                                | p=0.03    |
| Figure 7T   | Two-way ANOVA               | by treatment:<br>F <sub>(1,15)</sub> =9.134,<br>p=0.009<br>by genotype:<br>F <sub>(1,15)</sub> =58.49,<br>p<0.0001 | control IR vs. mutant IR                           | p=0.002   |
|             |                             |                                                                                                                    | Control nonIR vs. IR                               | p=0.00001 |
|             |                             |                                                                                                                    | Mutant nonIR vs. IR                                | p=0.03    |
| Figure 7U   | Two-way ANOVA               | by genotype:<br>F <sub>(1,15)</sub> =6.549,<br>p=0.02                                                              | control IR vs. mutant IR                           | p=0.001   |
| Figure S13I | Two-way ANOVA               | treatment:<br>F <sub>(1,12)</sub> =17.26,<br>p=0.0013                                                              | Post hoc multiple comparisons are not significant. |           |



|             |               |                                                                                                     |                          |           |
|-------------|---------------|-----------------------------------------------------------------------------------------------------|--------------------------|-----------|
| Figure S13J | Two-way ANOVA | treatment:<br>$F_{(1,12)}=17.26$ ,<br>$p=0.0013$                                                    | Mutant nonIR vs. IR      | $p=0.01$  |
| Figure S13P | Two-way ANOVA | by genotype:<br>$F_{(1,12)}=6.878$ ,<br>$p=0.02$                                                    | control IR vs. mutant IR | $p=0.02$  |
| Figure S13Q | Two-way ANOVA | by genotype:<br>$F_{(1,12)}=3.488$ ,<br>$p=0.086$                                                   | N/A                      |           |
| Figure S13R | Two-way ANOVA | by condition:<br>$F_{(1,12)}=12.49$<br>$p=0.004$<br>by genotype:<br>$F_{(1,12)}=10.56$<br>$p=0.007$ | mutant nonIR vs. IR      | $p=0.005$ |
|             |               |                                                                                                     | control IR vs. mutant IR | $p=0.007$ |
| Figure S13S | Two-way ANOVA | by genotype:<br>$F_{(1,12)}=0.534$<br>$p=0.4$                                                       | N/A                      |           |
